# Supplementary material for: A longitudinal genome-wide association study of anti-tumor necrosis factor response among Japanese patients with rheumatoid arthritis
Source: PubMed Central journal article supplement (PMC4718049; doi:10.1186/s13075-016-0920-6), 2016-01-18
Supplement: 13075_2016_920_MOESM1_ESM.pdf [file 13075_2016_920_MOESM1_ESM.pdf]

## Additional Figure 1

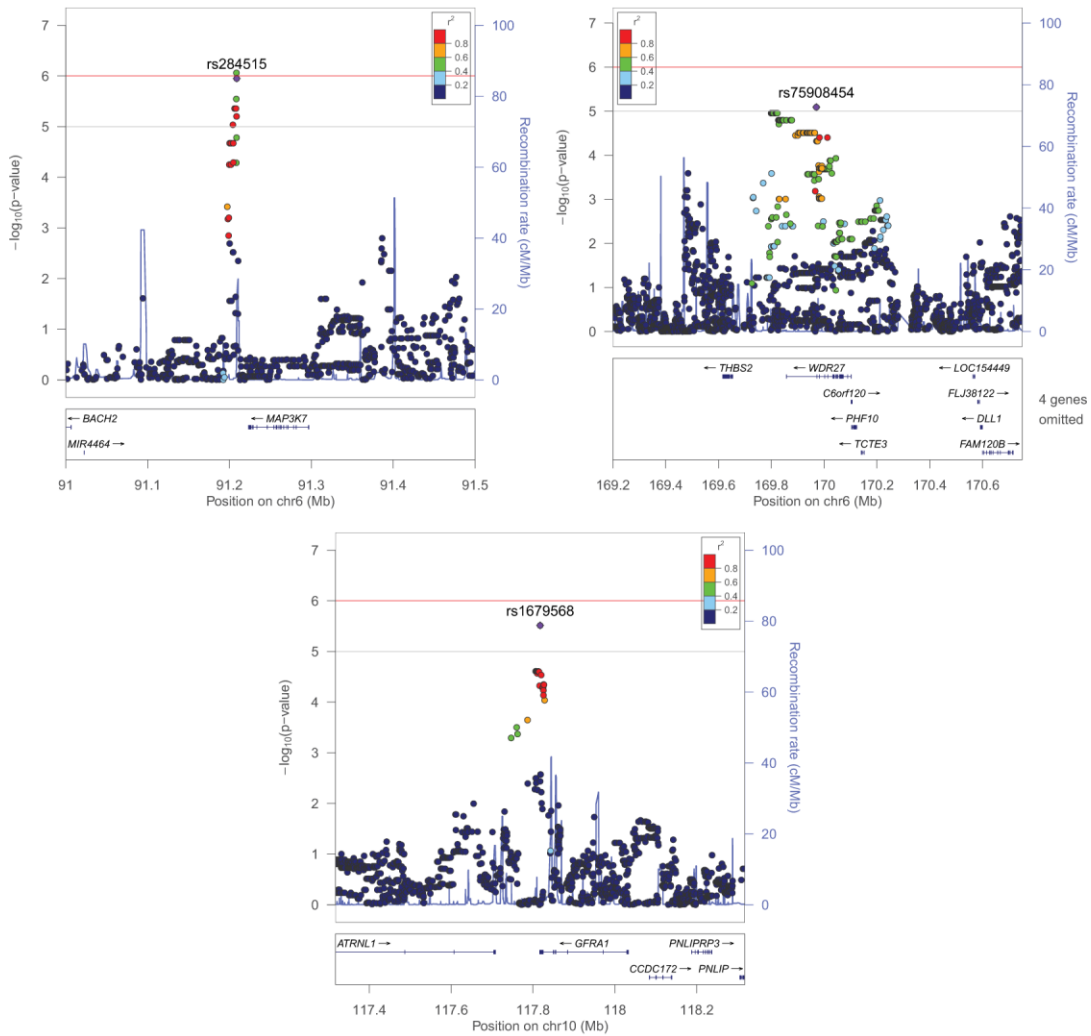

Regional plots showing association results from GEE models at 6q15, 6q27 and 10q25.3, when the analyses were restricted to patients with moderate or severe disease activity at baseline (n=413).
