# Supplementary material for: A longitudinal genome-wide association study of anti-tumor necrosis factor response among Japanese patients with rheumatoid arthritis
Source: PubMed Central journal article supplement (PMC4718049; doi:10.1186/s13075-016-0920-6), 2016-01-18
Supplement: 13075_2016_920_MOESM2_ESM.pdf [file 13075_2016_920_MOESM2_ESM.pdf]

## Additional Figure 2

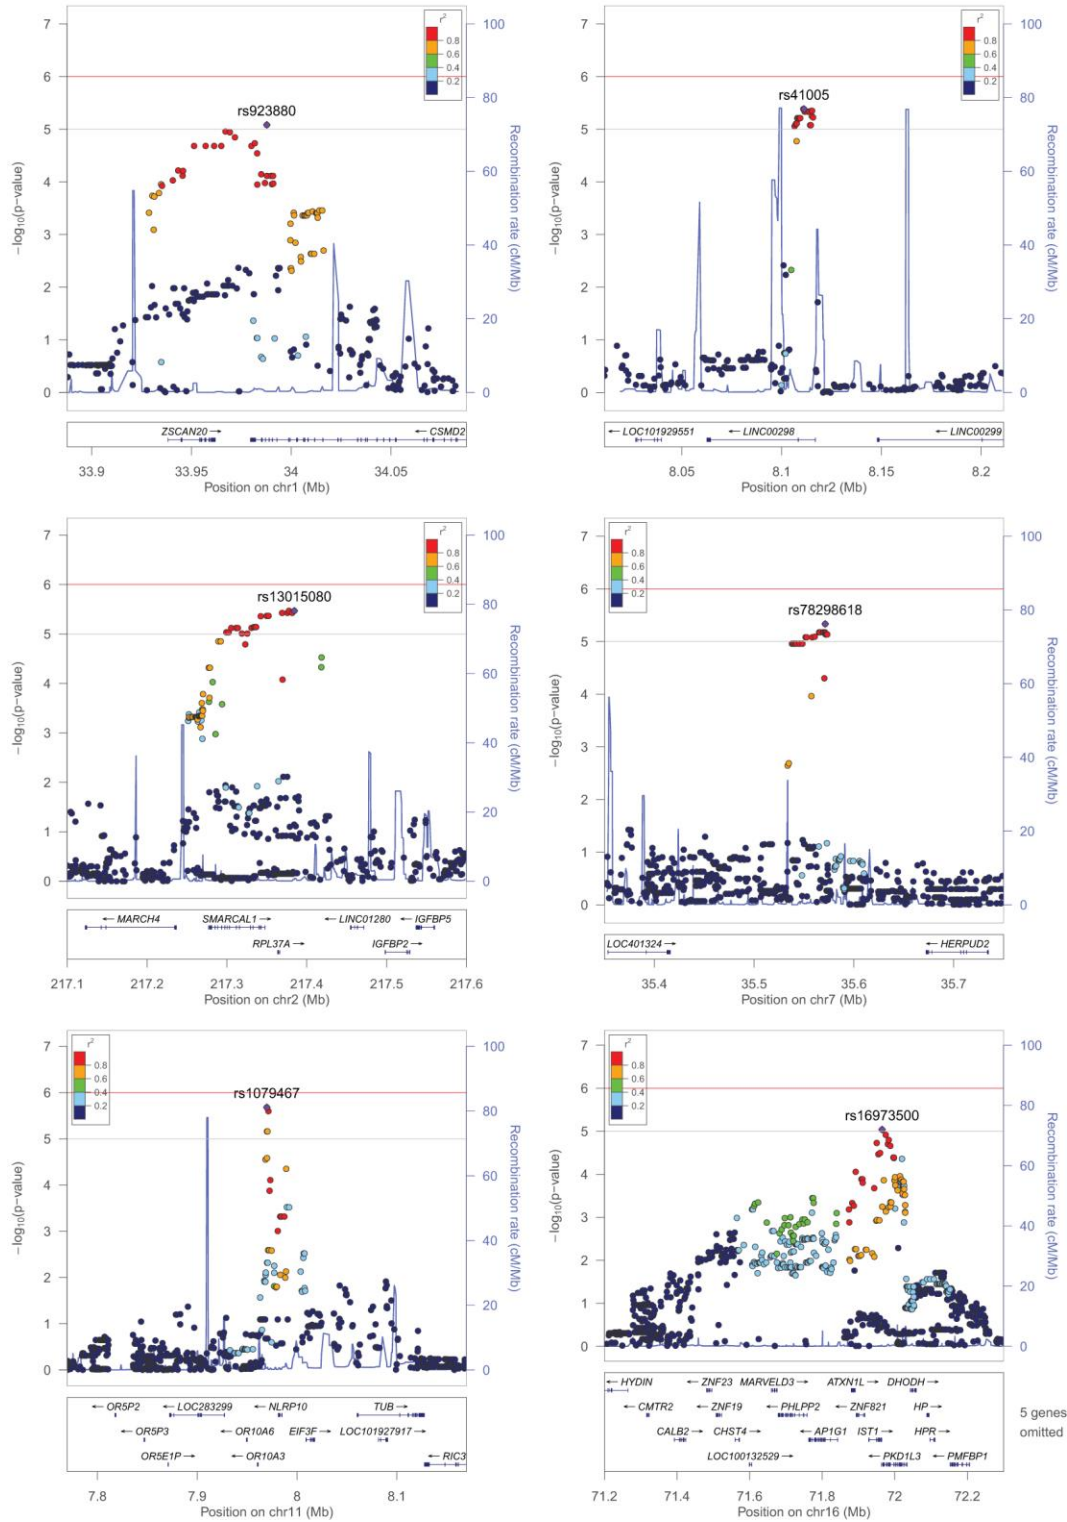

Regions showing moderate evidence of association ( $p < 1 \times 10^{-5}$ ) with anti-TNF response (GEE models).
