# Supplementary material for: A longitudinal genome-wide association study of anti-tumor necrosis factor response among Japanese patients with rheumatoid arthritis
Source: PubMed Central journal article supplement (PMC4718049; doi:10.1186/s13075-016-0920-6), 2016-01-18
Supplement: 13075_2016_920_MOESM3_ESM.pdf [file 13075_2016_920_MOESM3_ESM.pdf]

**Additional Table 1** – SNPs showing *moderate* evidence of association ( $p < 1 \times 10^{-5}$ ) with anti-TNF response.

| SNP         | Chr | Position (bp) | Minor allele | MAF  | All patients (n=444)    |                      | Patients with moderate/severe disease activity at baseline (n=413) |                      | Gene(s) in region of association |
|-------------|-----|---------------|--------------|------|-------------------------|----------------------|--------------------------------------------------------------------|----------------------|----------------------------------|
|             |     |               |              |      | $\beta$ (95% CI)        | P value              | $\beta$ (95% CI)                                                   | P value              |                                  |
| rs923880    | 1   | 33,987,778    | C            | 0.43 | -0.25<br>(-0.36, -0.14) | $8.3 \times 10^{-6}$ |                                                                    |                      | CSMD2                            |
| rs41005     | 2   | 8,111,231     | T            | 0.33 | 0.27<br>(0.16, 0.39)    | $4.1 \times 10^{-6}$ |                                                                    |                      | -                                |
| rs13015080* | 2   | 217,384,482   | A            | 0.31 | -0.28<br>(-0.40, -0.16) | $3.4 \times 10^{-6}$ | -0.30<br>(-0.43, -0.18)                                            | $1.1 \times 10^{-6}$ | SMARCAL1                         |
| rs1498103*  | 5   | 19,839,503    | A            | 0.46 | 0.24<br>(0.12, 0.35)    | $3.3 \times 10^{-5}$ | 0.26<br>(0.15, 0.38)                                               | $5.8 \times 10^{-6}$ | CDH18                            |
| rs78298618  | 7   | 35,571,257    | T            | 0.07 | -0.48<br>(-0.69, -0.28) | $4.6 \times 10^{-6}$ |                                                                    |                      | HERPUD2                          |
| rs1079467   | 11  | 7,969,711     | C            | 0.26 | 0.29<br>(0.17, 0.41)    | $2.1 \times 10^{-6}$ |                                                                    |                      | NLRP10                           |
| rs16973500  | 16  | 71,965,196    | T            | 0.38 | 0.24<br>(0.13, 0.34)    | $9.1 \times 10^{-6}$ |                                                                    |                      | PKD1L3, IST1, ATXN1L             |

Abbreviations: Chr: chromosome; MAF: Minor allele frequency;  $\beta$ : regression coefficient; 95% CI: 95% confidence interval.

\* In these 2 regions, increased significance was achieved in the patient subset where those with mild disease activity at baseline had been excluded (n=413).
